# Supplementary material for: CF3 H-bonding locked aromatic stacking of picric acid with mechanofluorochromic fluorophores: highly selective reusable sensor and rewritable fluorescence platform
Source: Royal Society of Chemistry journal article supplement (doi:10.1039/d2me00075j), 2022-01-01
Supplement: d2me00075j1.pdf [file d2me00075j1.pdf]

## Electronic Supplementary Information (ESI)

### CF<sub>3</sub> H-bonding Locked Aromatic Stacking of Picric Acid with Mechanofluorochromic fluorophores: Highly Selective Reusable Sensor and Rewritable Fluorescence Platform

Parthasarathy Gayathri,<sup>a</sup> Sasikala Ravi,<sup>a</sup> Periyappan Nantheeswaran,<sup>b</sup> Mariappan Mariappan,<sup>b</sup> Subramanian Karthikeyan,<sup>c</sup> Mehboobali Pannipara,<sup>d,e</sup> Abdullah G. Al-Sehemi,<sup>d,e</sup> Dohyun Moon\*<sup>f</sup> Savarimuthu Philip Anthony\*<sup>a</sup>

<sup>a</sup>)School of Chemical & Biotechnology, SASTRA Deemed University, Thanjavur-613401, Tamil Nadu, India. Fax: +914362264120; Tel: +914362264101; E-mail: philip@biotech.sastra.edu

<sup>b</sup>)Department of Chemistry, SRM IST, Kattankulathur, Chennai-603203, Tamil Nadu, India.

<sup>c</sup>)PG and Research Department of Chemistry, KhadirMohideen College, Adirampattinam, Tamil Nadu, India.

<sup>d</sup>)Research center for Advanced Materials Science, King Khalid University, Abha 61413, Saudi Arabia.

<sup>e</sup>)Department of chemistry, King Khalid University, Abha 61413, Saudi Arabia.

<sup>f</sup>)Beamline Department, Pohang Accelerator Laboratory, 80 Jigokro-127beongil, Nam-gu, Pohang, Gyeongbuk, Korea, Email: dmoon@postech.ac.kr

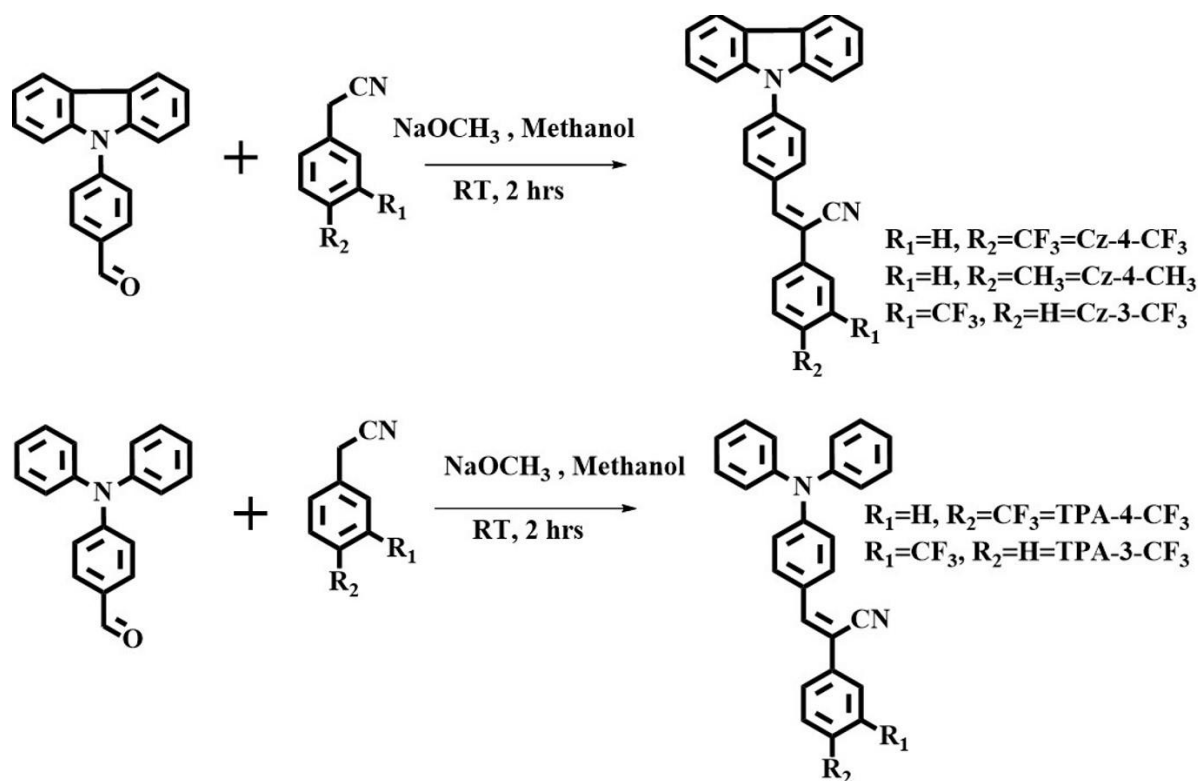

Scheme S1. Synthesis of Cz-4-CF<sub>3</sub>, Cz-4-CH<sub>3</sub>, Cz-3-CF<sub>3</sub>, TPA-4-CF<sub>3</sub> and TPA-3-CF<sub>3</sub>.

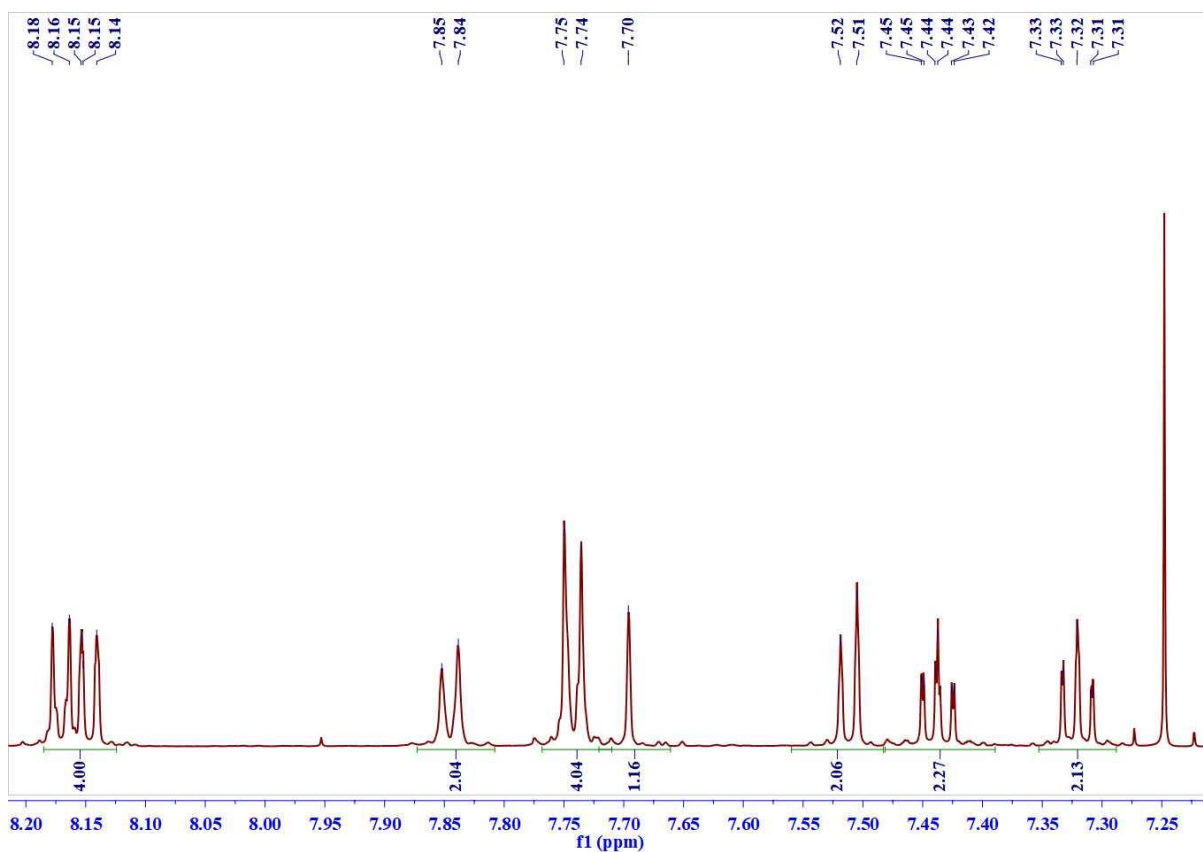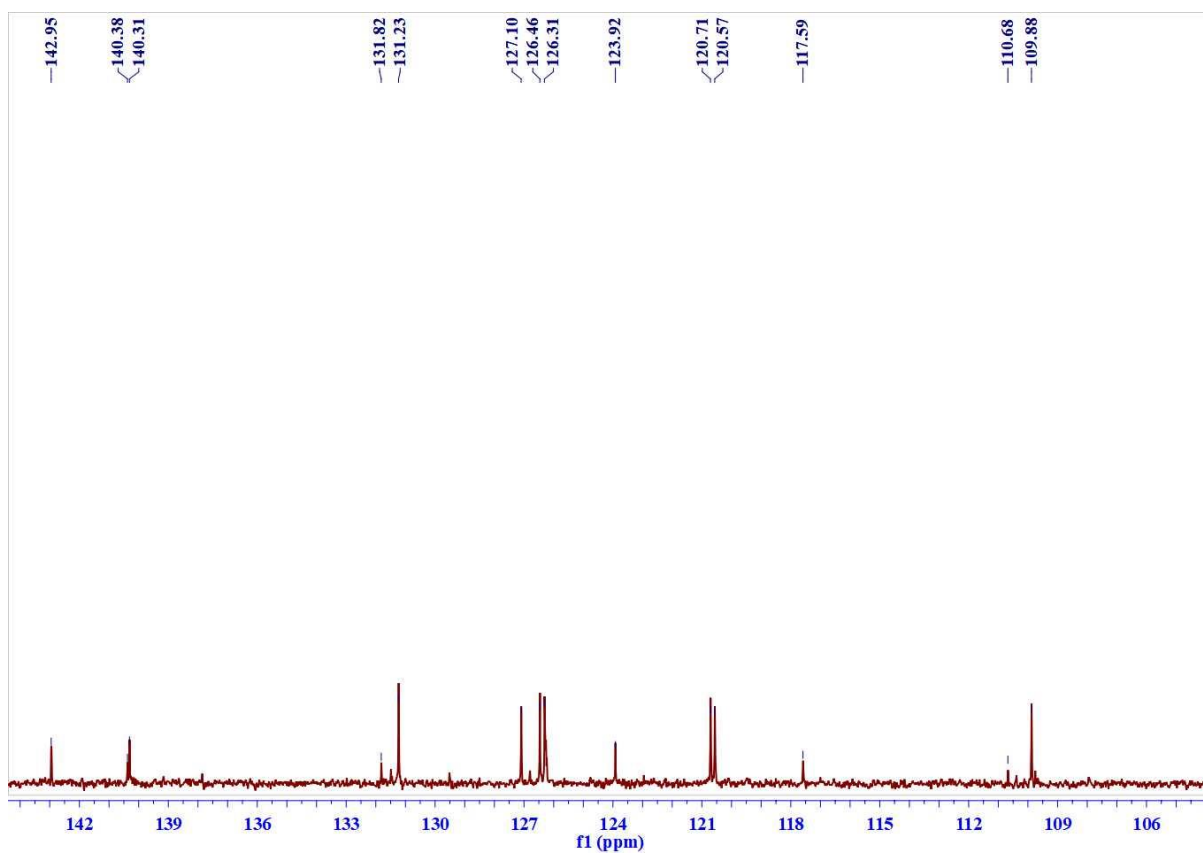

$^1\text{H}$  and  $^{13}\text{C}$  NMR of **Cz-4-CF<sub>3</sub>** (solvent =  $\text{CDCl}_3$ ).

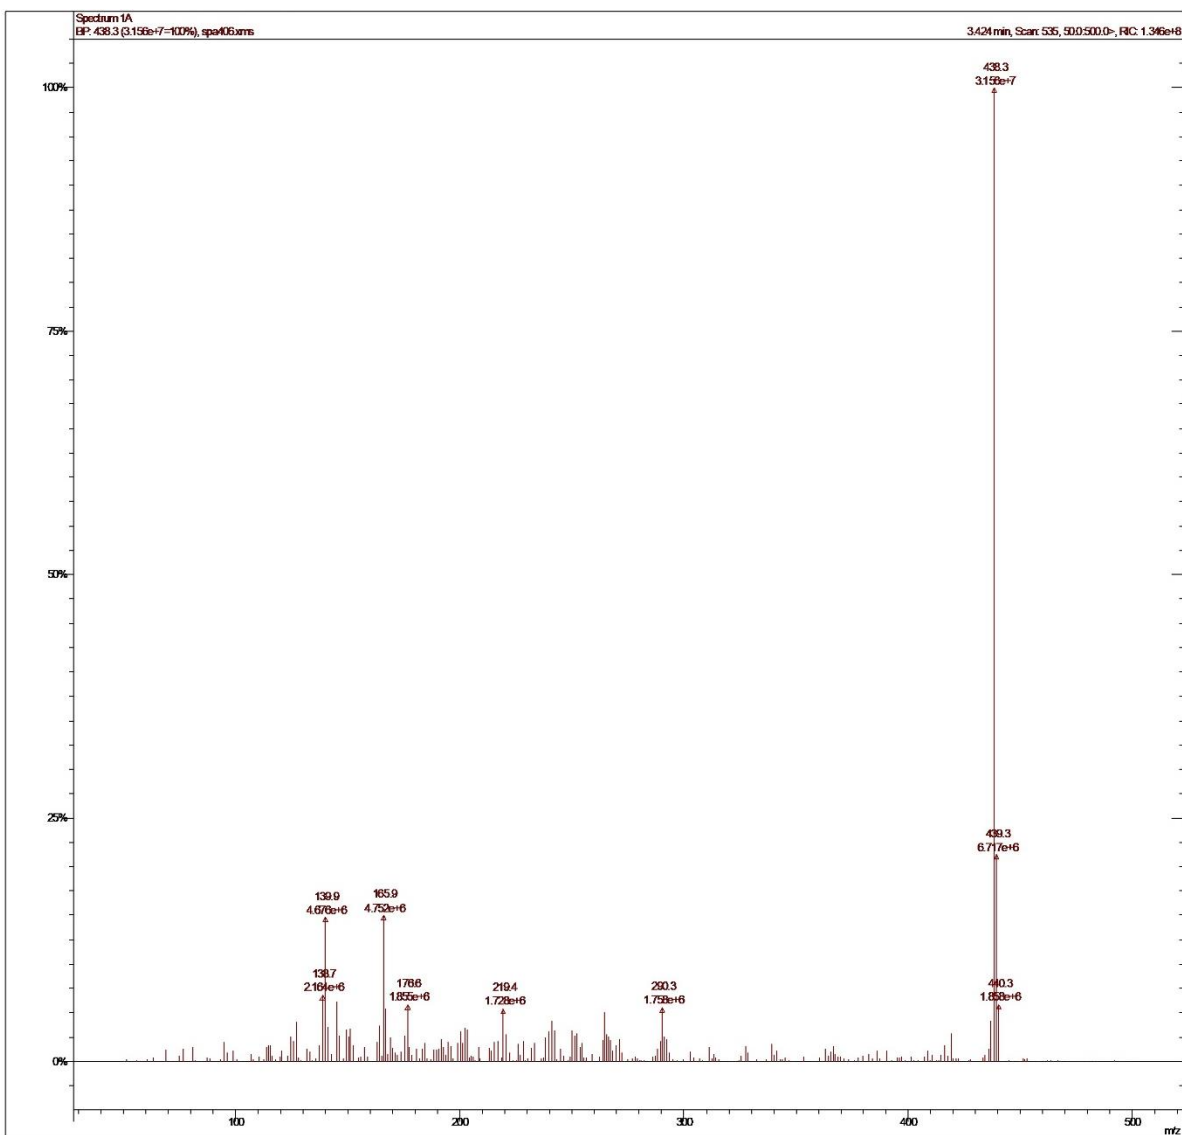

**Cz-4-CF<sub>3</sub>**: m/z calcd for C<sub>28</sub>H<sub>17</sub>F<sub>3</sub>N<sub>2</sub> (M + H): 438.13, found: 438.3.

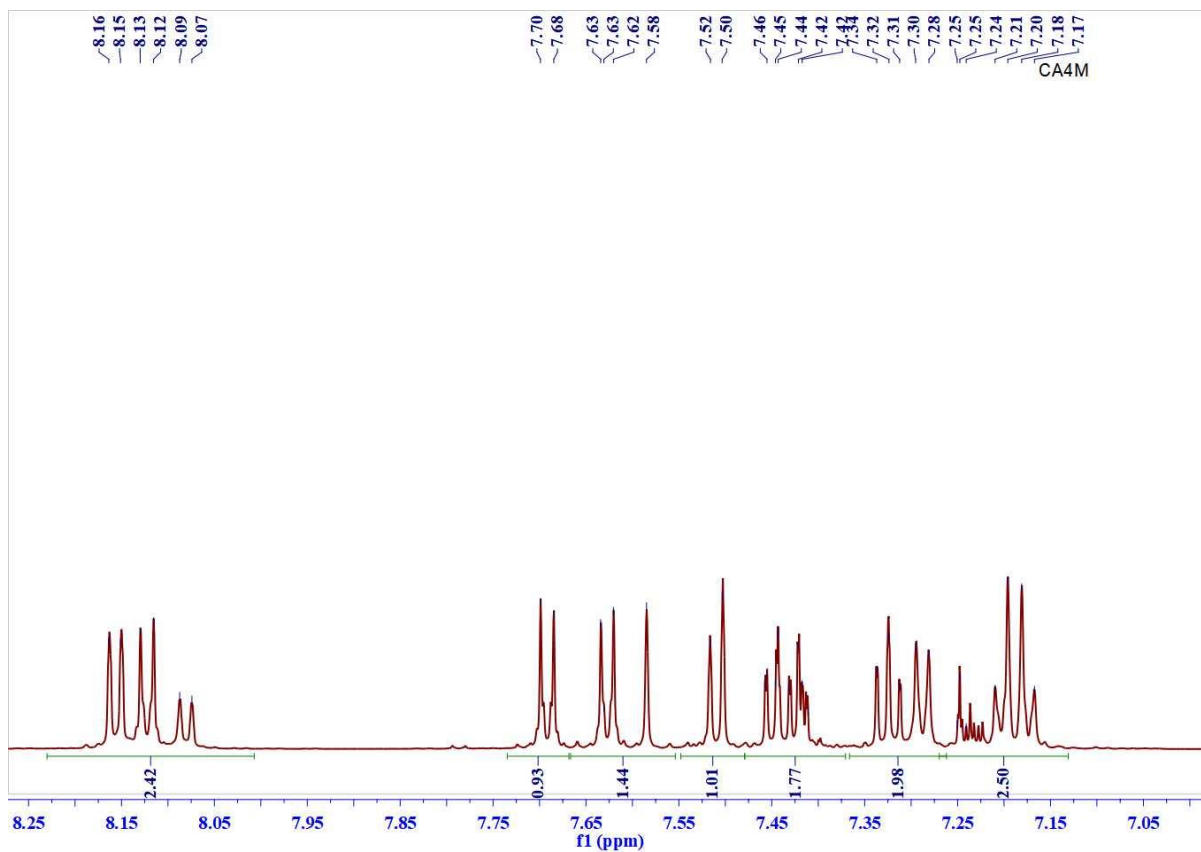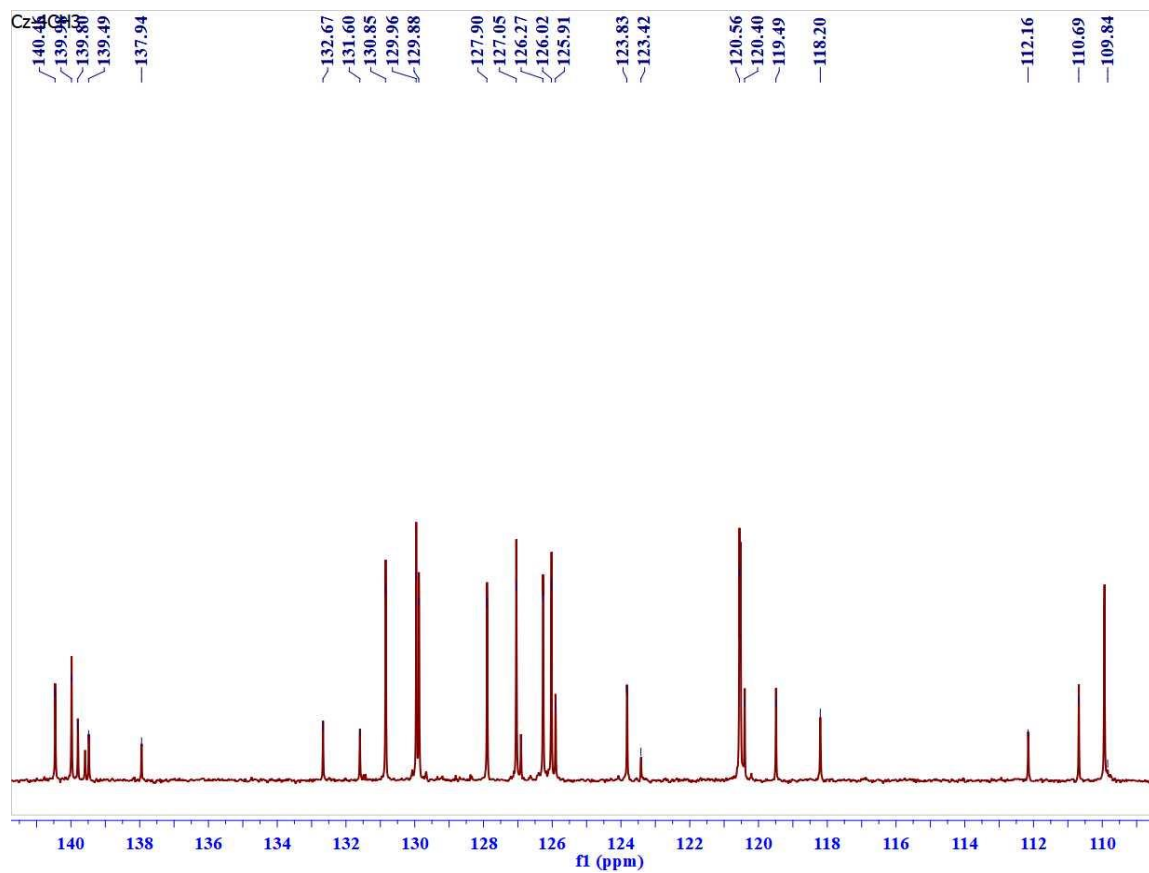

$^1\text{H}$  and  $^{13}\text{C}$  NMR of **Cz-4-CH<sub>3</sub>** (solvent =  $\text{CDCl}_3$ ).

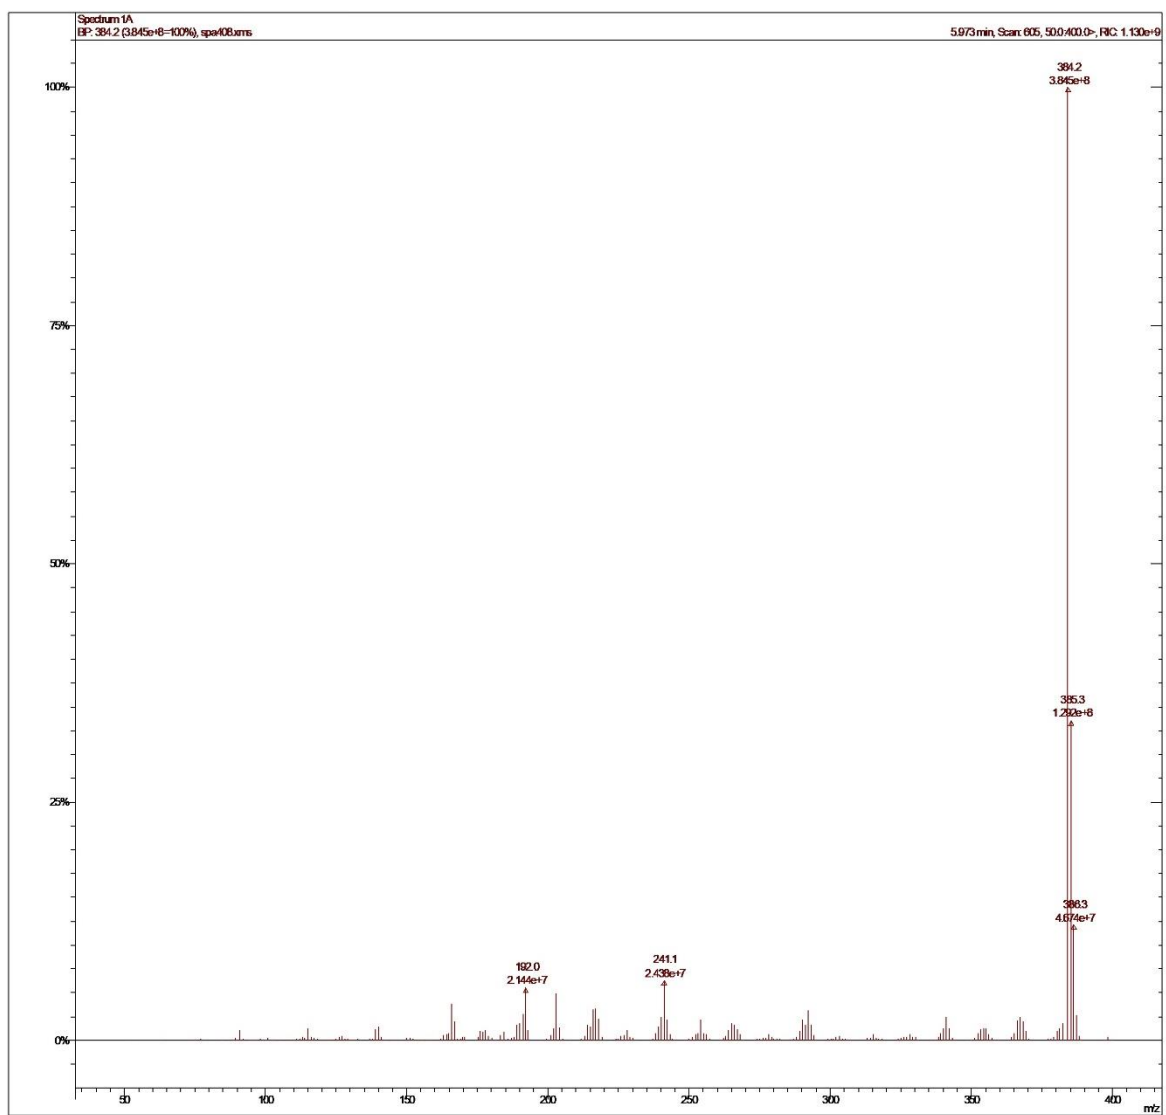

**Cz-4-CH<sub>3</sub>**: m/z calcd for C<sub>28</sub>H<sub>20</sub>N<sub>2</sub> (M + H): 384.16, found: 384.2.

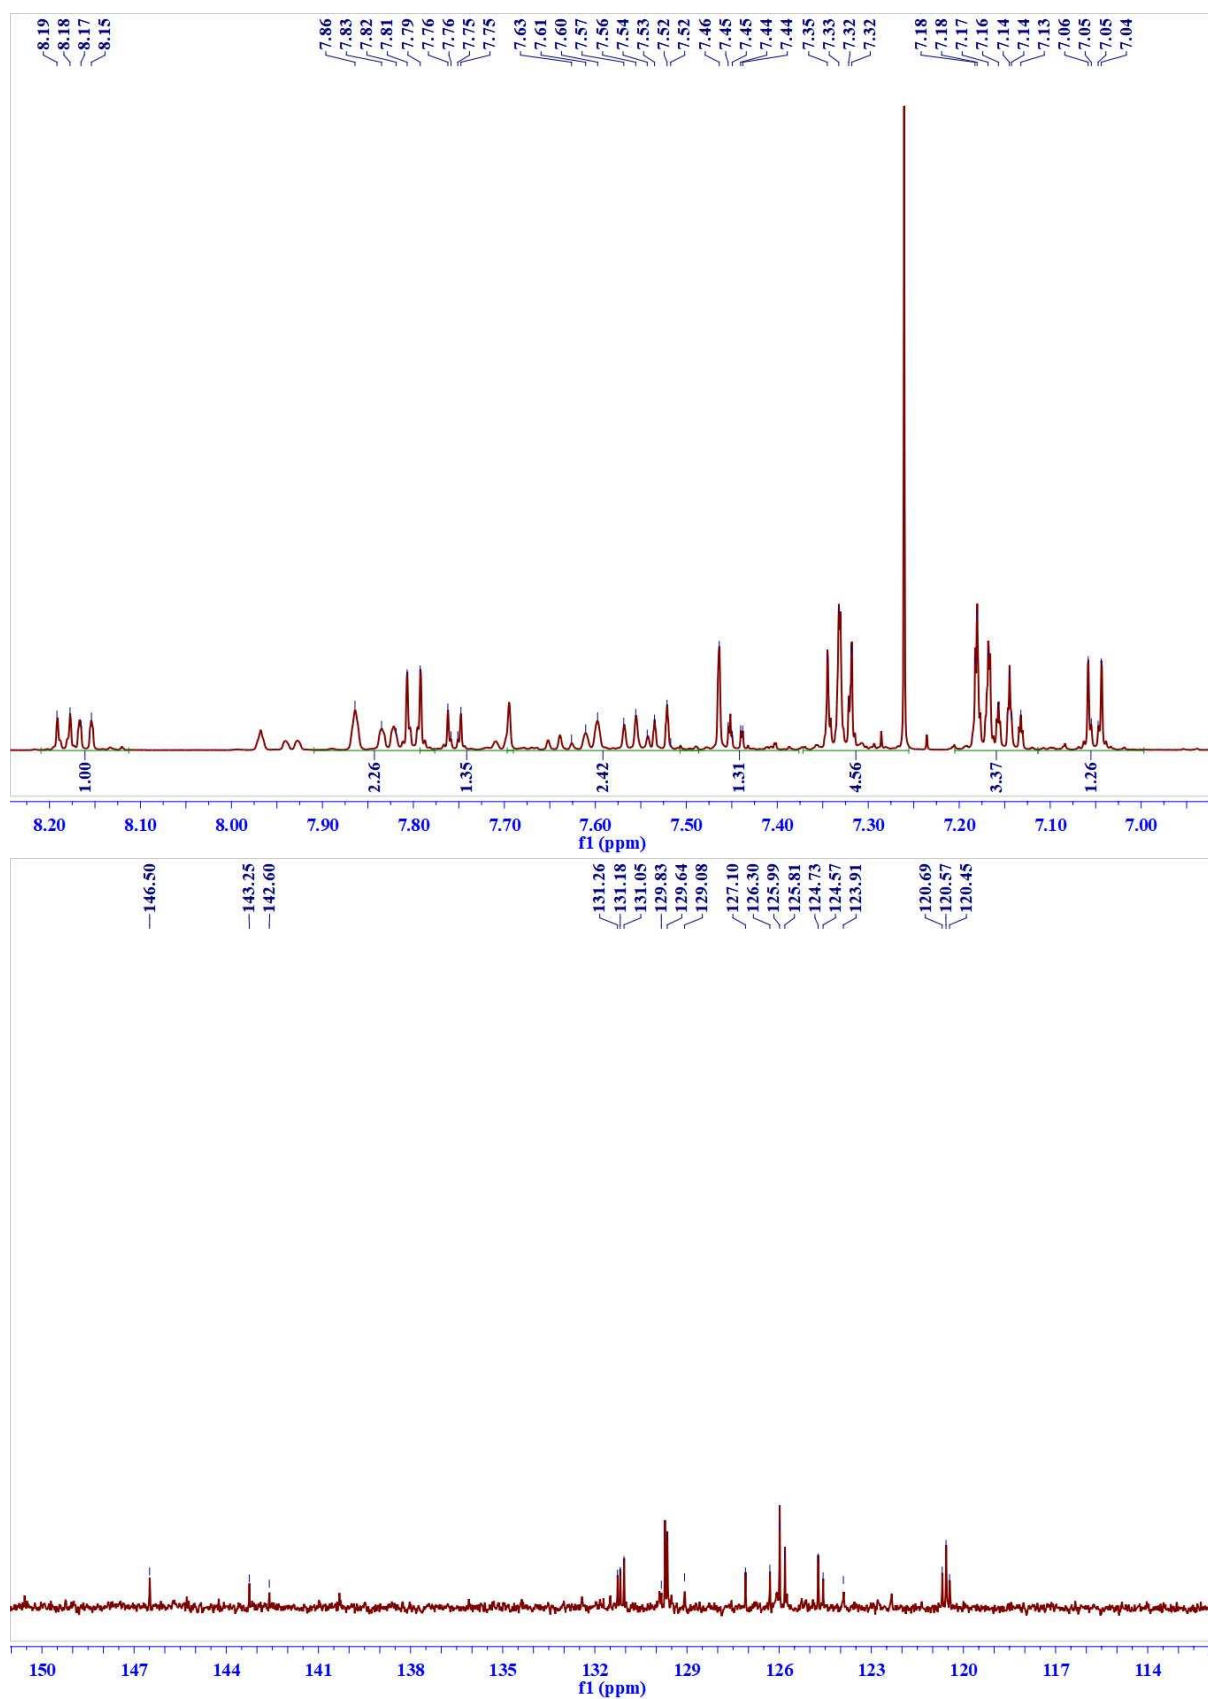

<sup>1</sup>H and <sup>13</sup>C NMR of Cz-3-CF<sub>3</sub> (solvent = CDCl<sub>3</sub>).

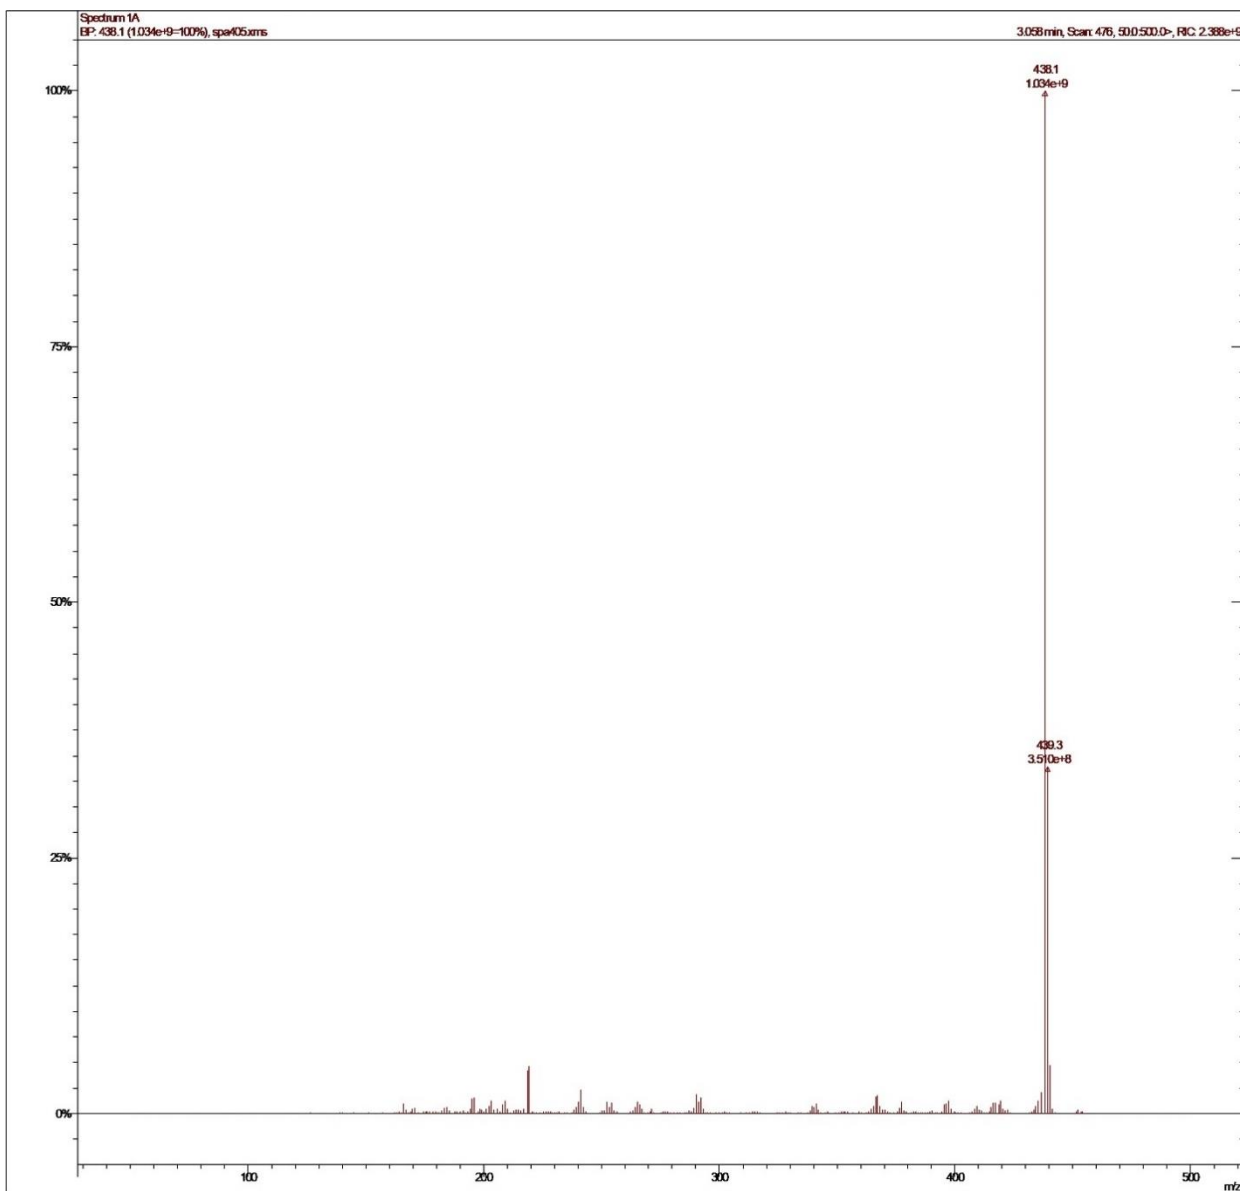

**Cz-3-CF<sub>3</sub>**: m/z calcd for C<sub>28</sub>H<sub>17</sub>F<sub>3</sub>N<sub>2</sub> (M + H): 438.13, found: 438.1.

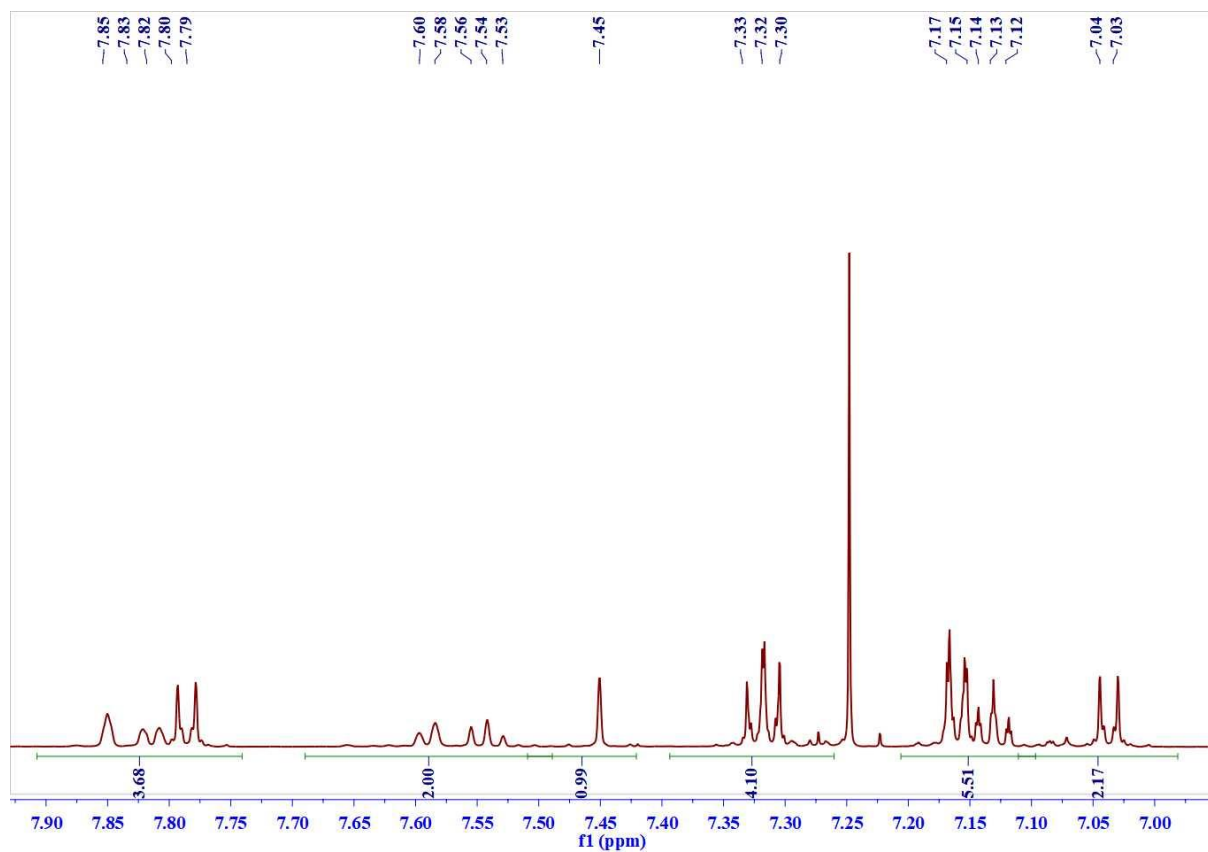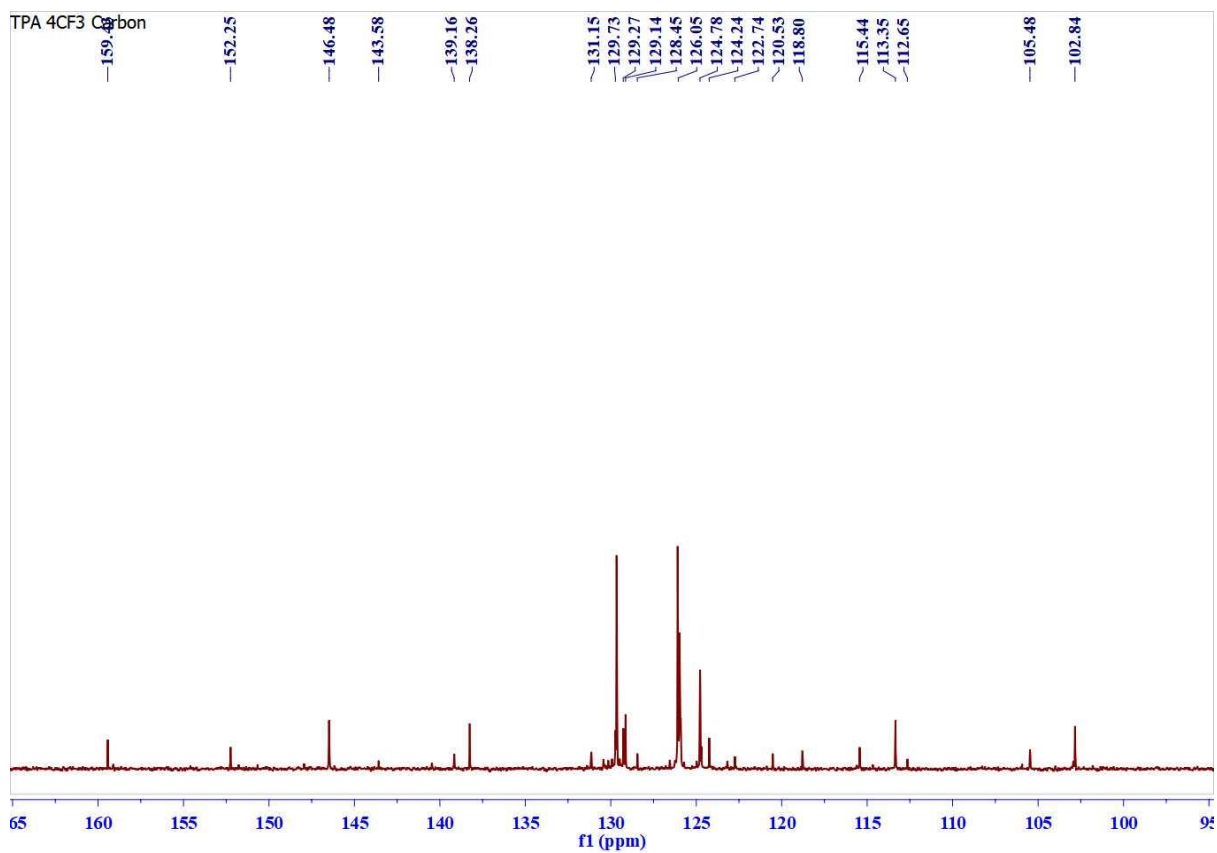

<sup>1</sup>H and <sup>13</sup>C NMR of TPA-4-CF<sub>3</sub> (solvent = CDCl<sub>3</sub>).



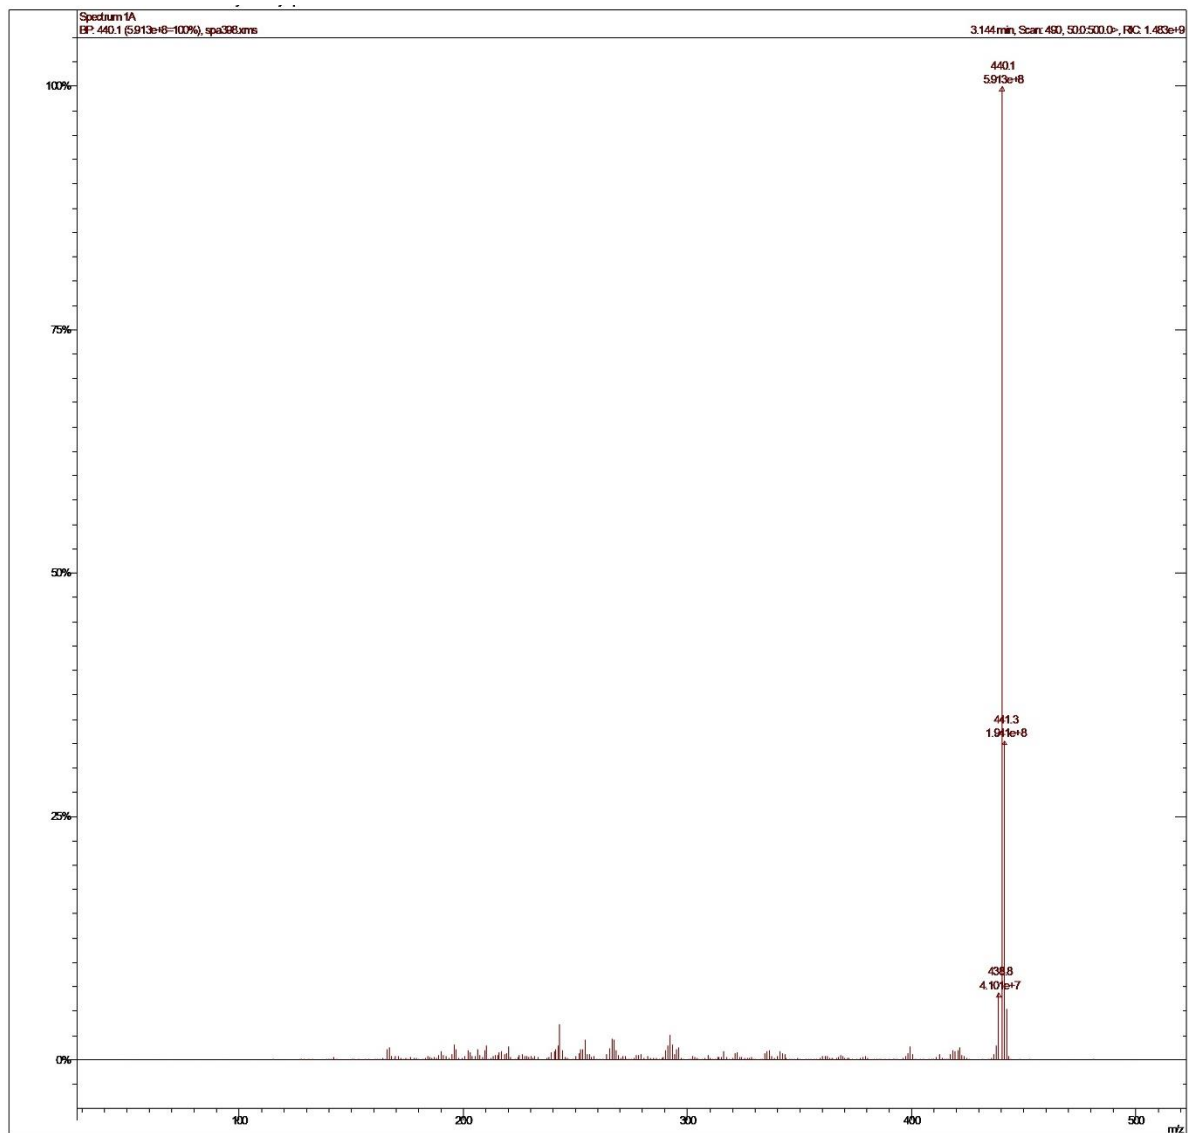

**TPA-4-CF<sub>3</sub>**: m/z calcd for C<sub>28</sub>H<sub>19</sub>F<sub>3</sub>N<sub>2</sub> (M + H): 440.15, found: 440.1.

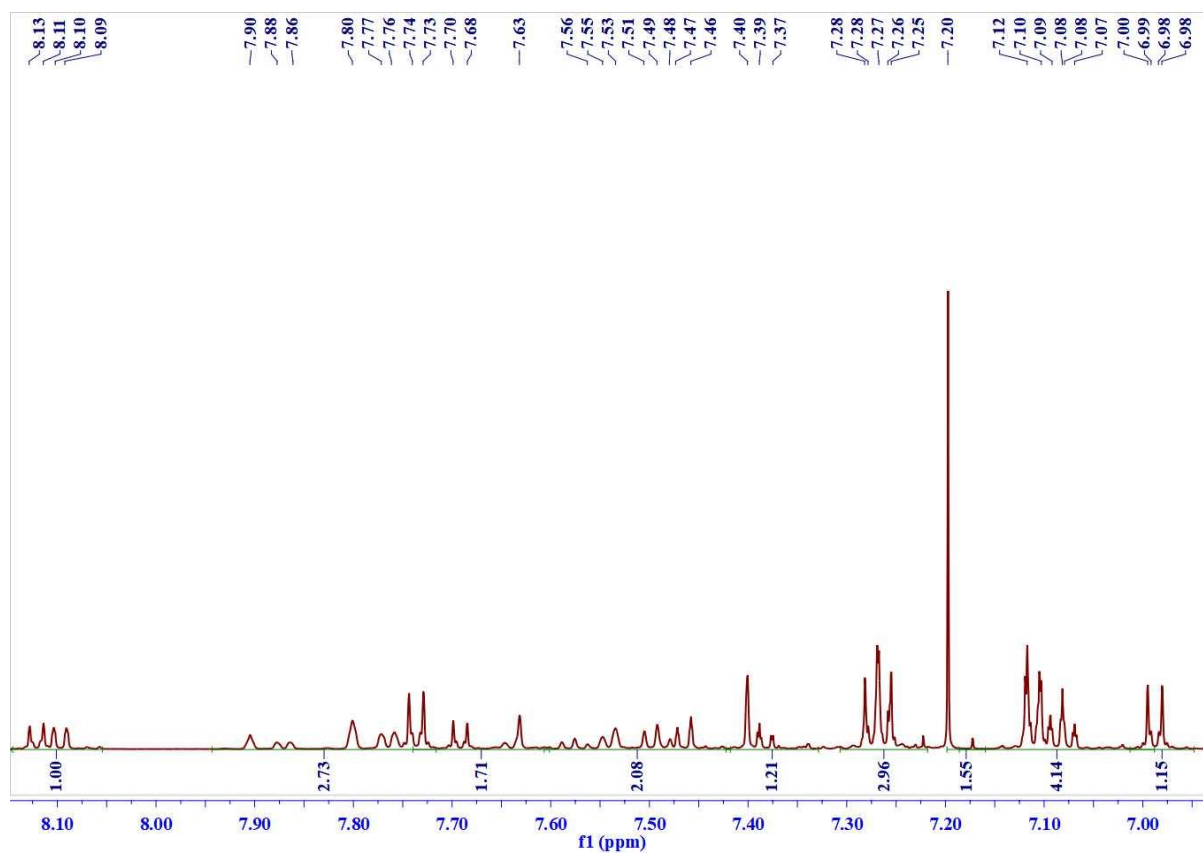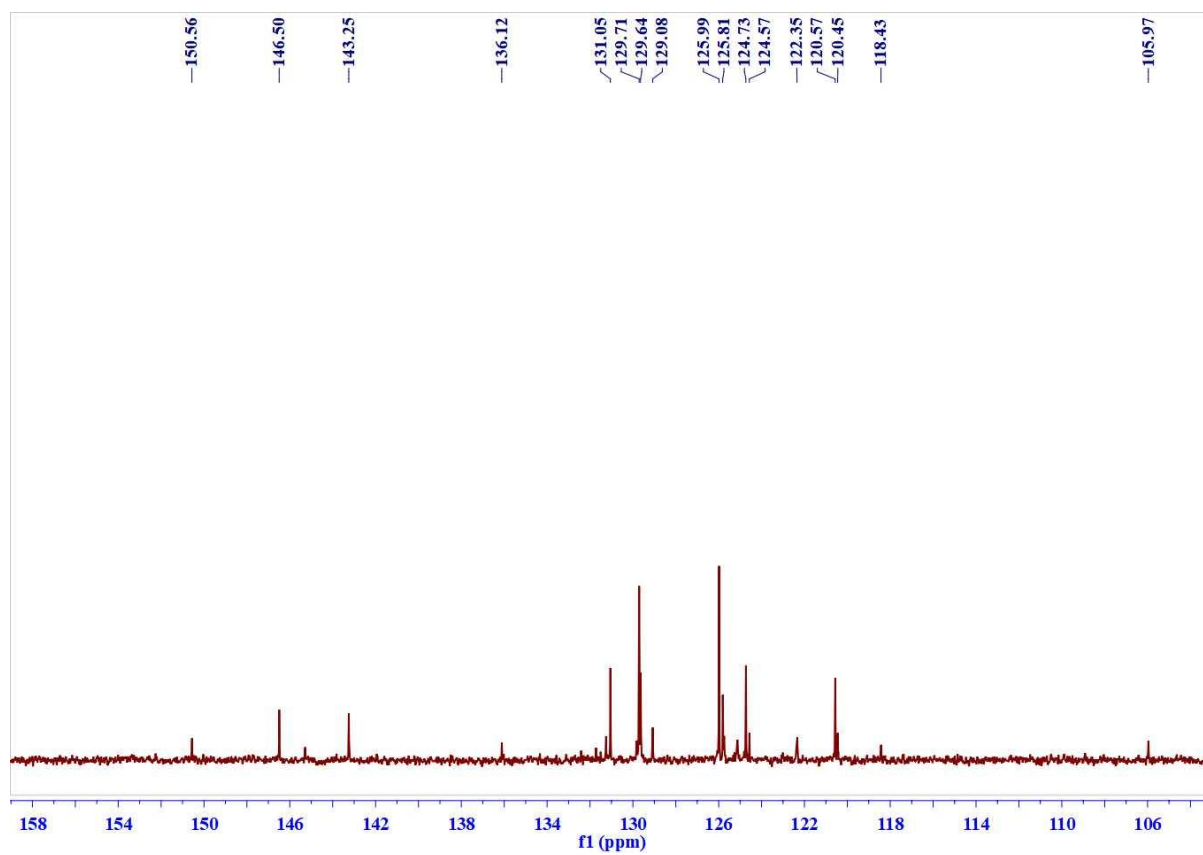

<sup>1</sup>H and <sup>13</sup>C NMR of TPA-3-CF<sub>3</sub> (solvent = CDCl<sub>3</sub>).

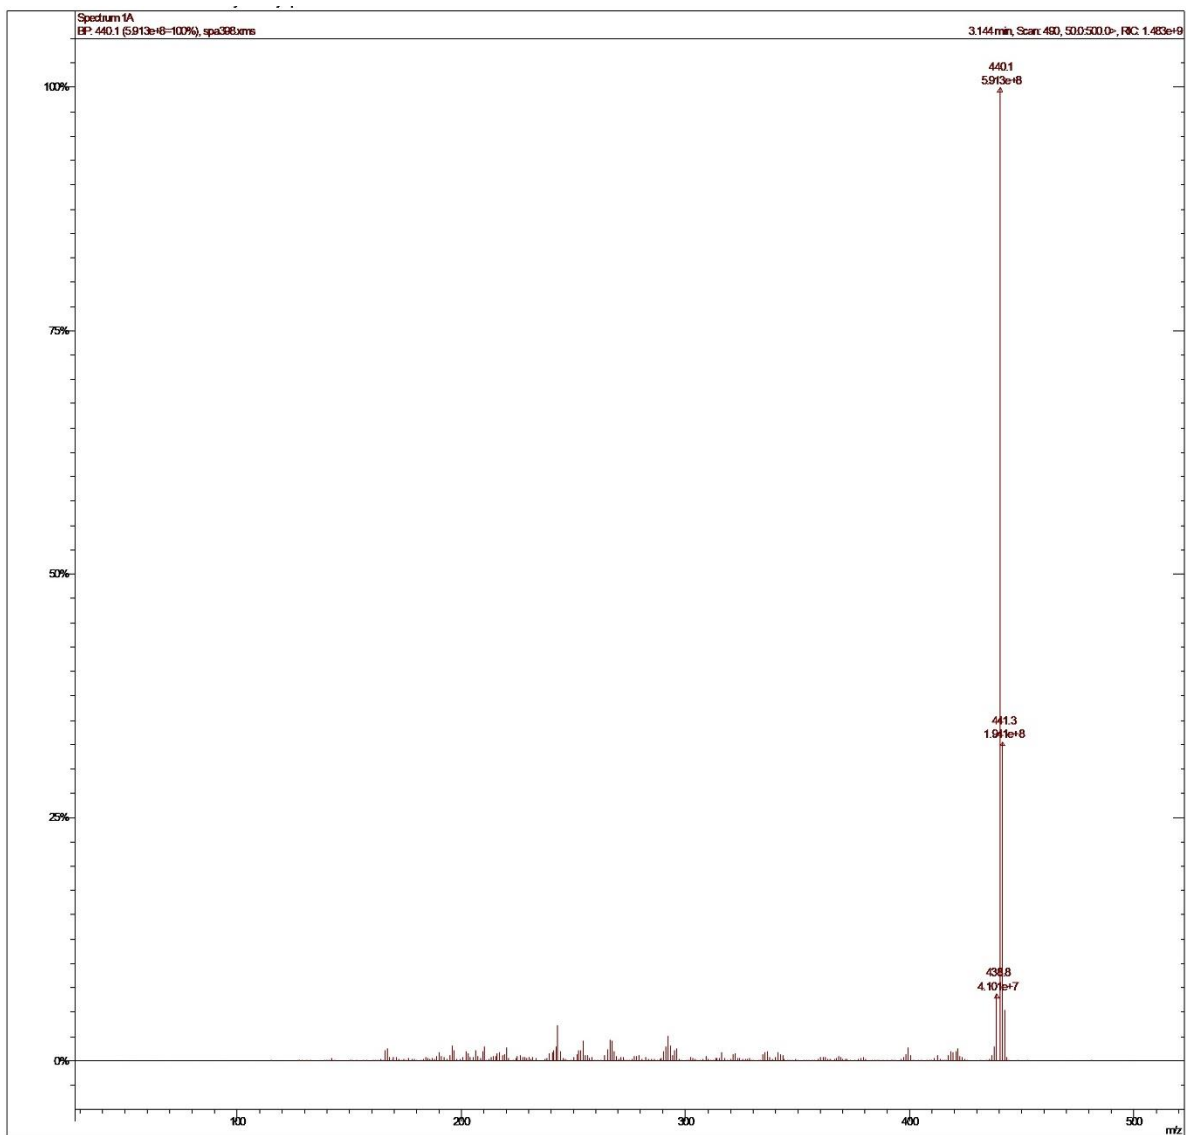

**TPA-3-CF<sub>3</sub>**: m/z calcd for C<sub>28</sub>H<sub>19</sub>F<sub>3</sub>N<sub>2</sub> (M + H): 440.15, found: 440.1.

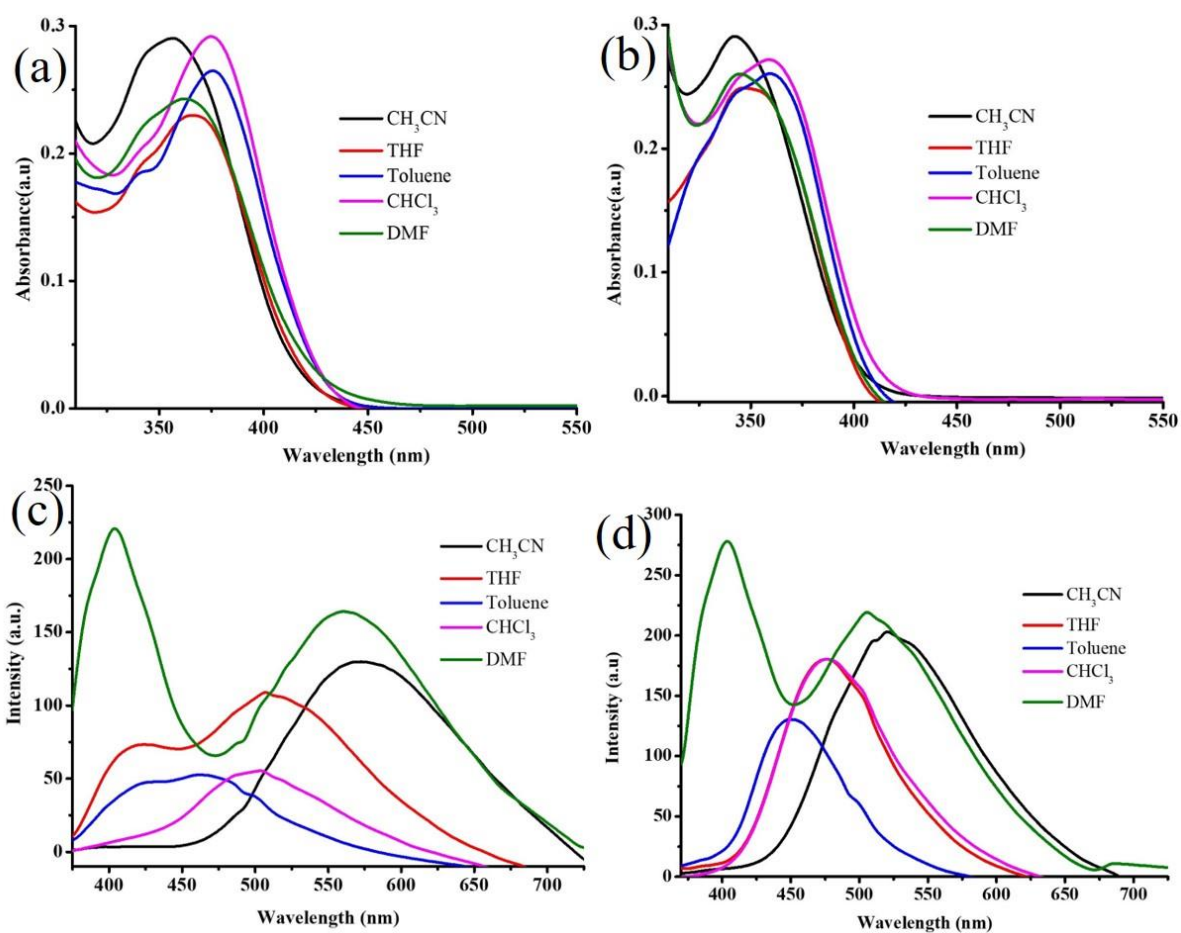

Fig. S1. Absorption (a,b) and fluorescence (c, d) spectra of (a, c) Cz-4-CF<sub>3</sub> and (b, d) Cz-4-CH<sub>3</sub> in different solvents.

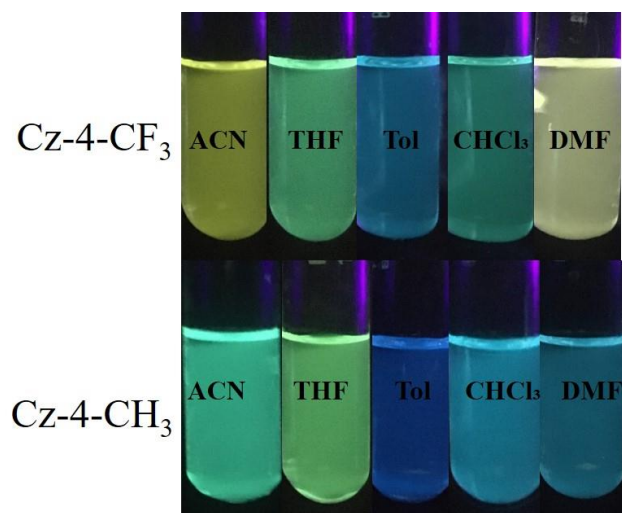

Fig. S2. Digital fluorescence images of Cz-4-CF<sub>3</sub> and Cz-4-CH<sub>3</sub> in different solvents.

Table S1. Quantum yield of Cz-4-CF<sub>3</sub> and Cz-4-CH<sub>3</sub> in solvents with respect to quinine sulphate.

| Solvent            | Quantum yield ( $\Phi_F$ ) |                      |
|--------------------|----------------------------|----------------------|
|                    | Cz-4-CF <sub>3</sub>       | Cz-4-CH <sub>3</sub> |
| CH <sub>3</sub> CN | 0.023                      | 0.040                |
| CHCl <sub>3</sub>  | 0.010                      | 0.045                |
| DMF                | 0.040                      | 0.064                |
| THF                | 0.018                      | 0.039                |
| Toluene            | 0.012                      | 0.029                |

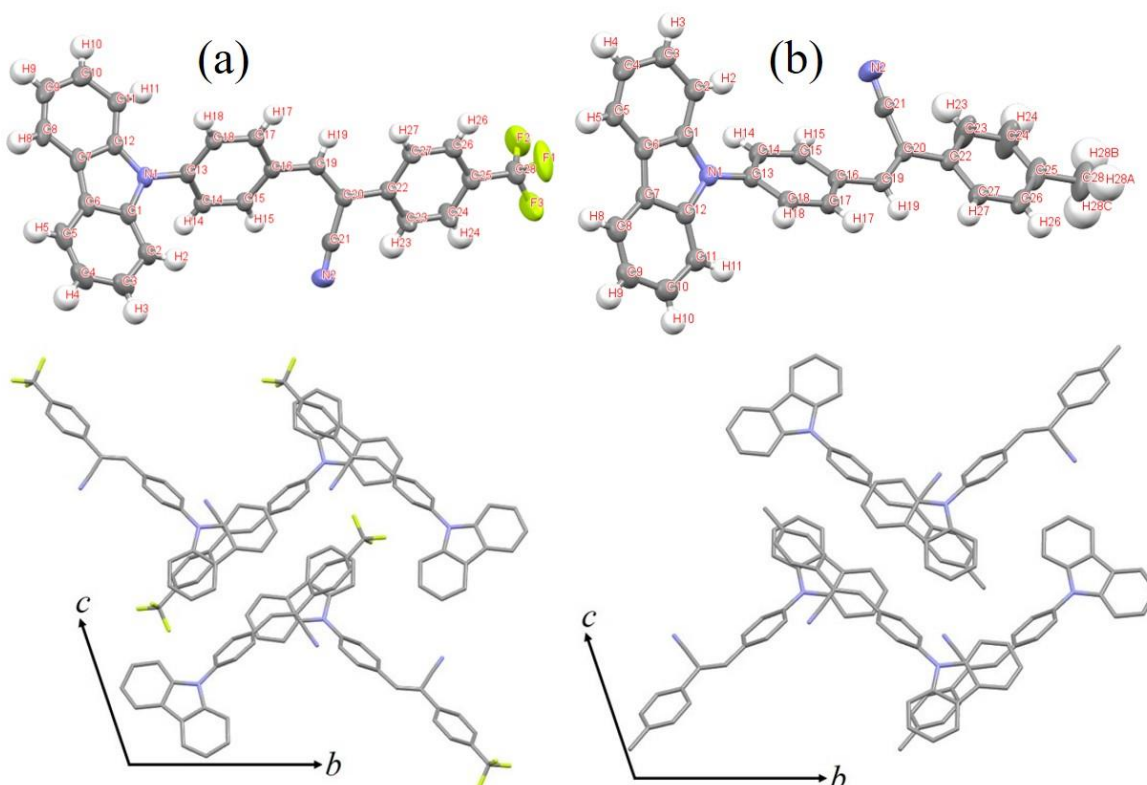

Fig. S3. Thermal ellipsoid and molecular packing in the crystal lattice of (a) **Cz-4-CF<sub>3</sub>** and (b) **Cz-4-CH<sub>3</sub>**. Hydrogen atoms are omitted for clarity. C (grey), N (blue) and F (yellow).

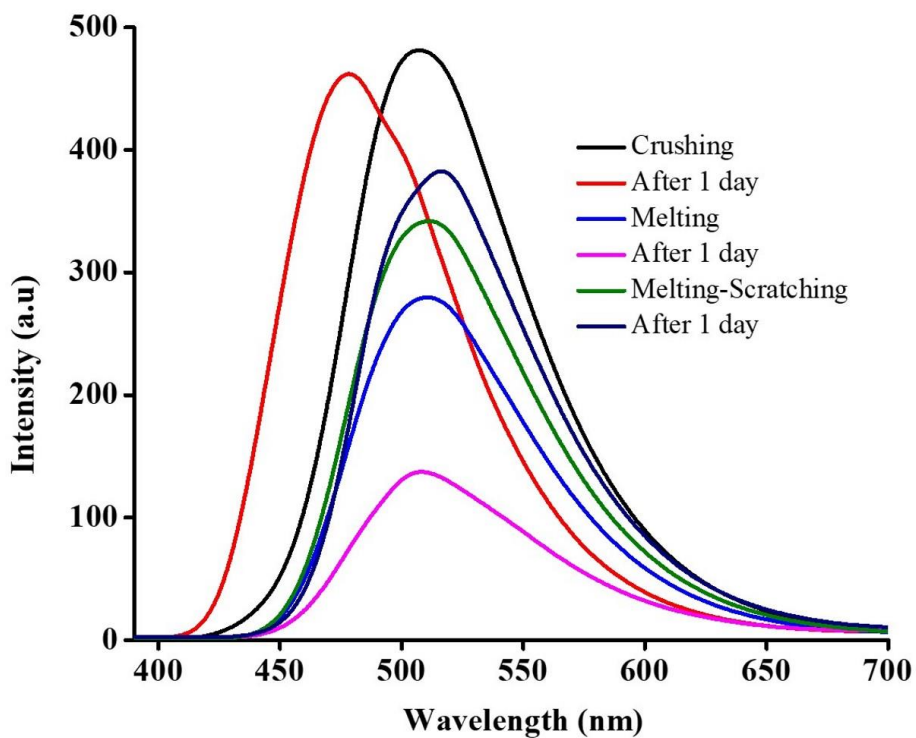

Fig. S4. Self-reversible fluorescence spectra of Cz-4-CF<sub>3</sub> after different external treatment.

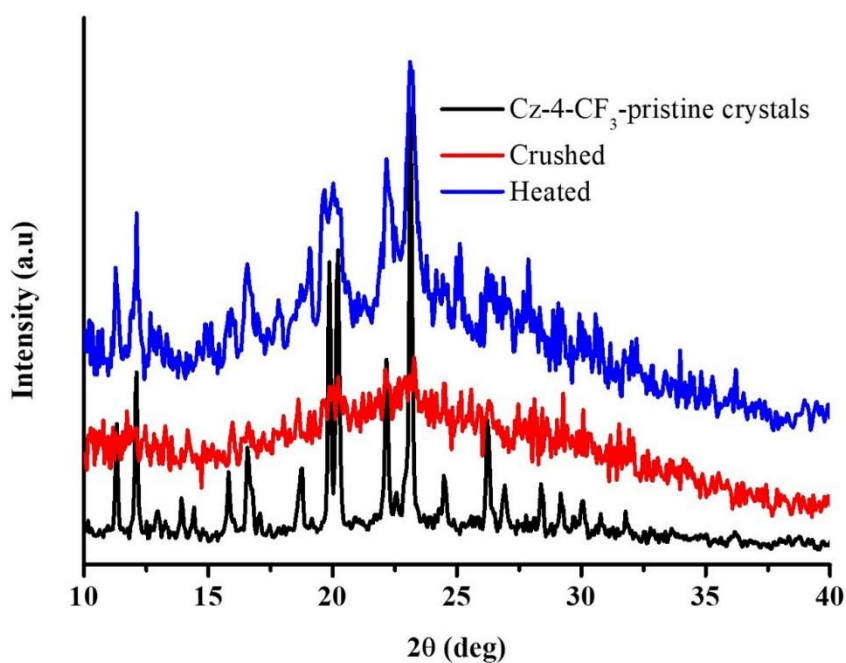

Fig. S5. PXRD pattern of Cz-4-CF<sub>3</sub>. Crushing sample measurement was performed immediately after crushing since it would self-reverse to initial state with time.

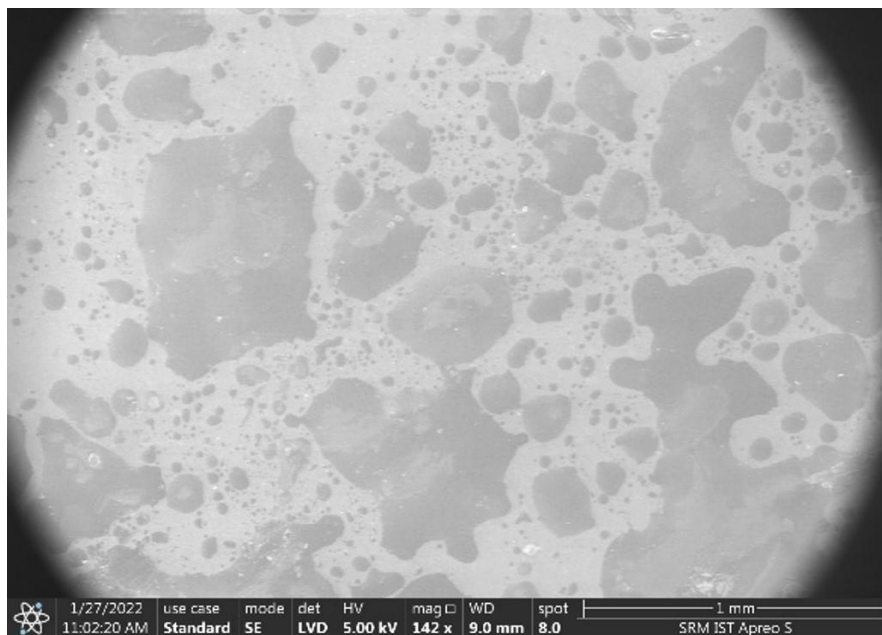

Fig. S6. SEM image of Cz-4-CF<sub>3</sub> at melt state.

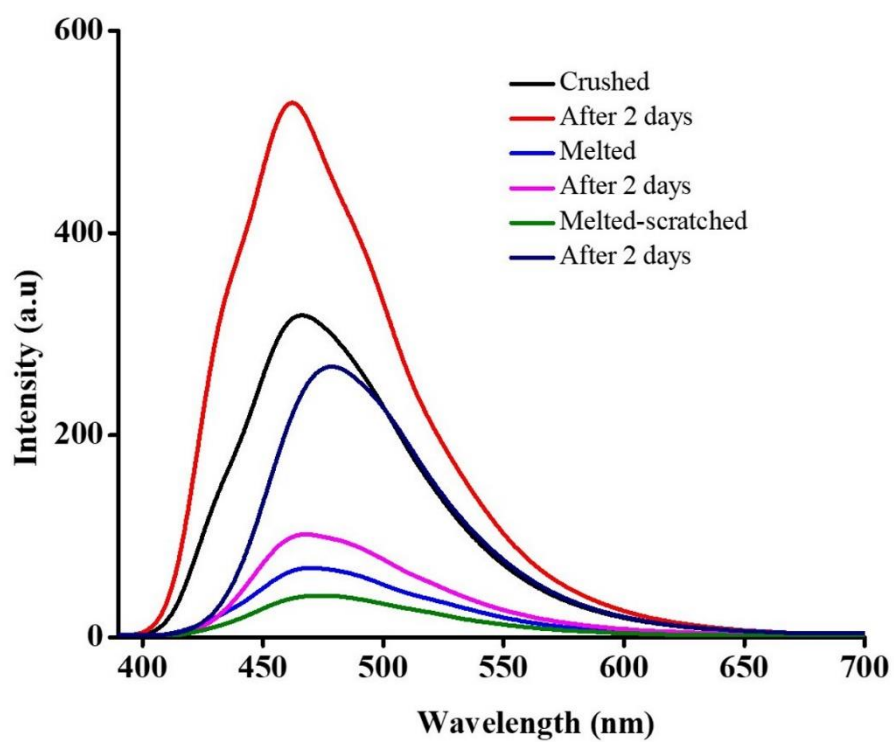

Fig. S7. Self-reversible fluorescence spectra of Cz-4-CH<sub>3</sub> after different external treatment.



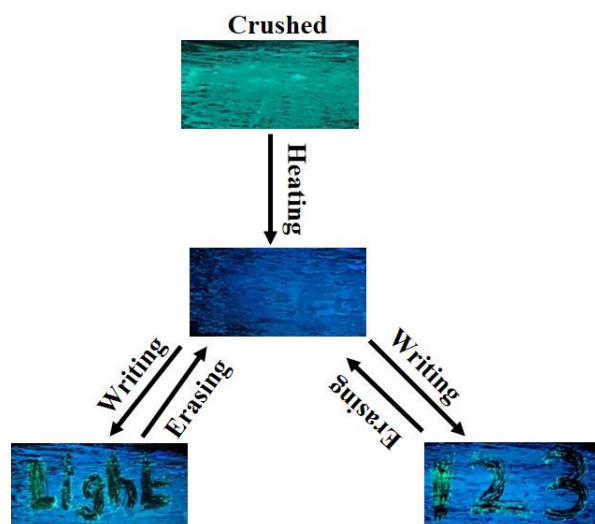

Fig. S8. Demonstrating rewritable fluorescent platforms using **Cz-4-CF<sub>3</sub>** by crushing and heating.  $\lambda_{\text{exc}} = 365 \text{ nm}$ .

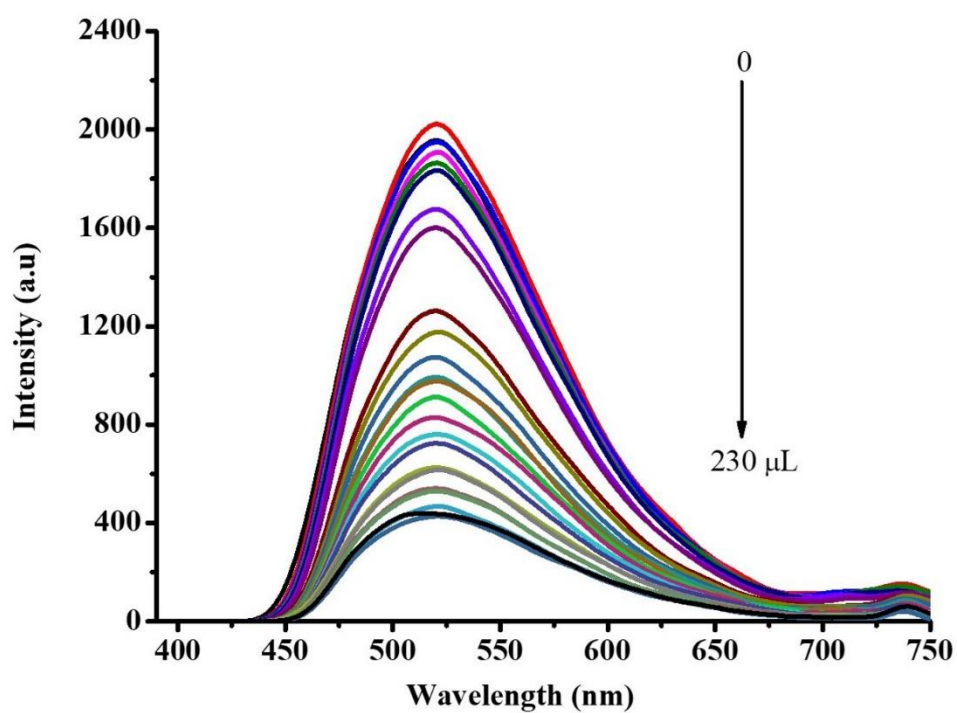

Fig. S9. PA ( $10^{-4} \text{ M}$ ) concentration dependent fluorescence change of Cz-4-CF<sub>3</sub> ( $10^{-4} \text{ M}$ ).



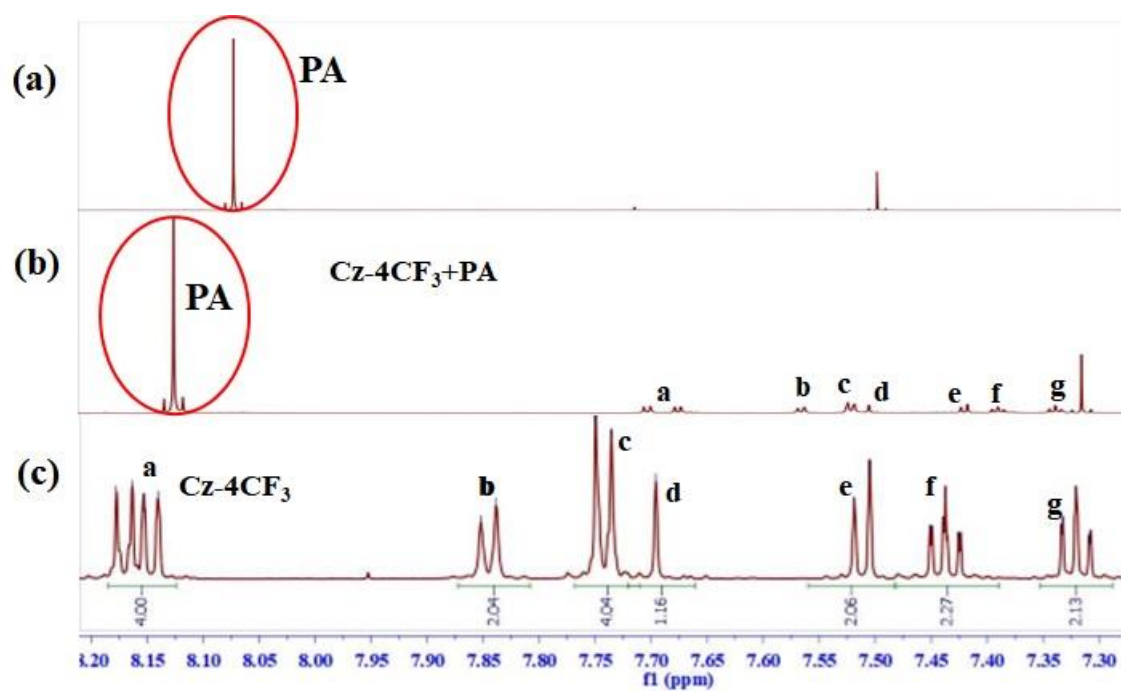

Fig. S10. (a)  $^1\text{H}$  NMR spectra of **PA** (ii) upon the addition of 1 equiv of **PA** into **Cz-4-CF<sub>3</sub>**(1:1 ratio); (iii)  $^1\text{H}$  NMR spectra of **Cz-4-CF<sub>3</sub>** in  $\text{CDCl}_3$ .

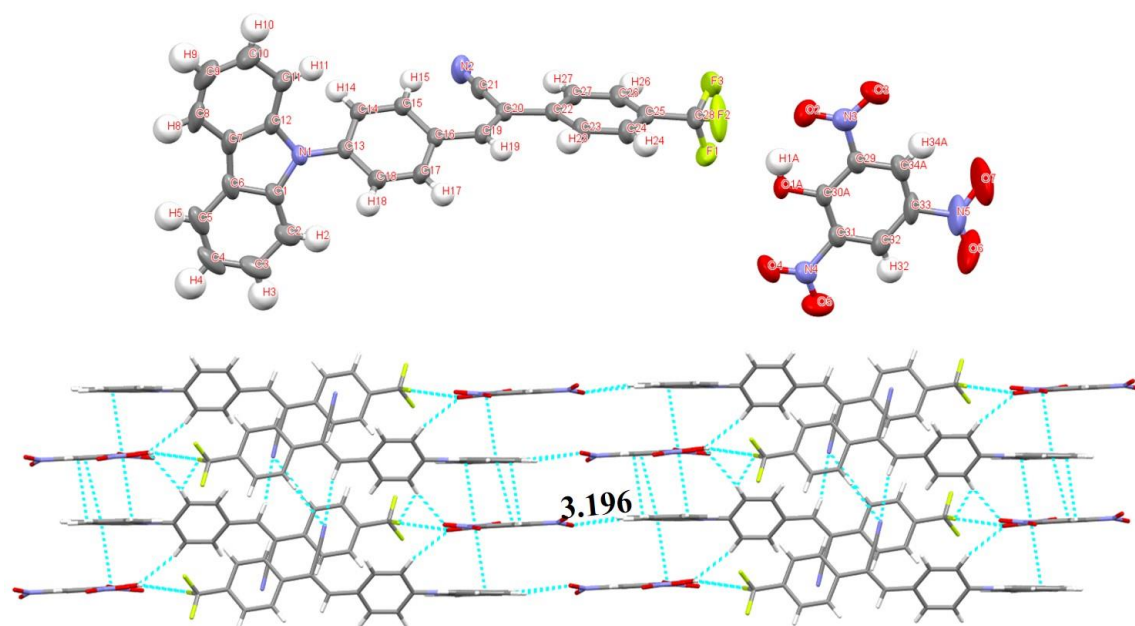

Fig. S11. Thermal ellipsoid and aromatic  $\pi$ -stacking between carbazole and **PA** aromatic unit and intermolecular interactions in the crystal lattice of **Cz-4-CF<sub>3</sub>-PA**. C (grey), H (white), N (blue), O (red) and F (yellow). Dotted lines indicate the hydrogen bonding and  $\pi \dots \pi$  interactions in  $\text{\AA}$  and distances along with e.s.d values are 3.196 (6).

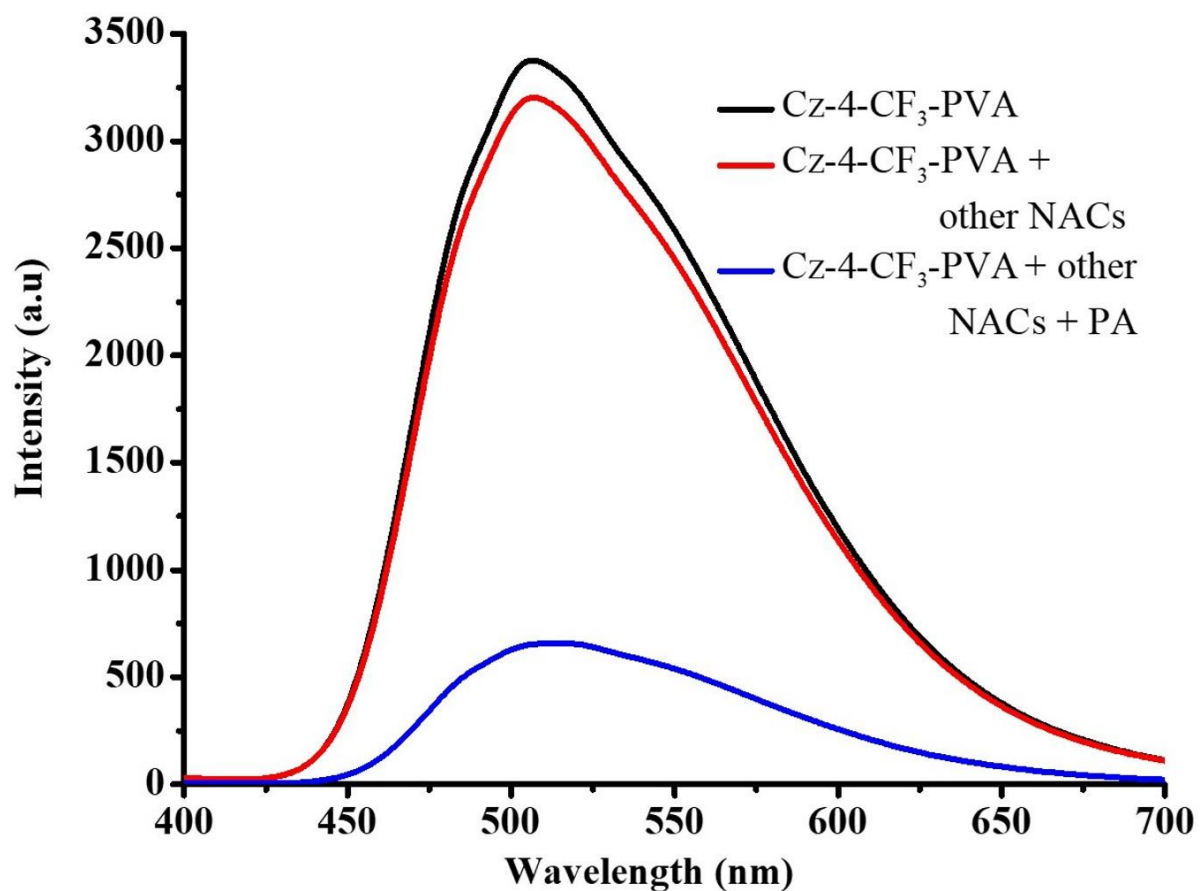

Fig. S12. Fluorescence sensing of Cz-4-CF<sub>3</sub>-PVA thin film towards PA ( $10^{-4}$  M) in presence of other nitroaromatics (NACs,  $10^{-4}$  M).

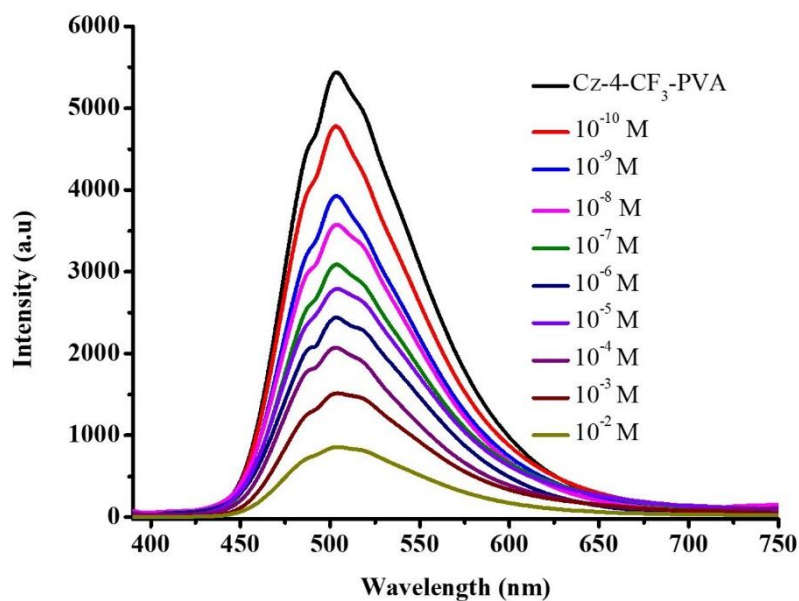

Fig. S13. Fluorescence sensing of Cz-4-CF<sub>3</sub>-PVA thin film towards PA in different concentration. The film was dipped for 30s and recovered back upon dipping in pure water for 1-2 min.

Table S2. Cz-4-CF<sub>3</sub>-PVA thin film sensing of PA in real water samples with known concentration.

| Sample      | Spiked (M)       | Detected (M)          | Recovery (%) |
|-------------|------------------|-----------------------|--------------|
| Sea water   | 10 <sup>-3</sup> | 1.05x10 <sup>-3</sup> | 105%         |
|             | 10 <sup>-6</sup> | 1.04x10 <sup>-6</sup> | 104%         |
| River water | 10 <sup>-3</sup> | 0.98x10 <sup>-3</sup> | 98%          |
|             | 10 <sup>-6</sup> | 1.01x10 <sup>-6</sup> | 101%         |
| Pond water  | 10 <sup>-4</sup> | 0.99x10 <sup>-4</sup> | 99%          |
|             | 10 <sup>-7</sup> | 1.02x10 <sup>-7</sup> | 102%         |
| Lake water  | 10 <sup>-4</sup> | 0.96x10 <sup>-4</sup> | 96%          |
|             | 10 <sup>-7</sup> | 1.03x10 <sup>-7</sup> | 103%         |

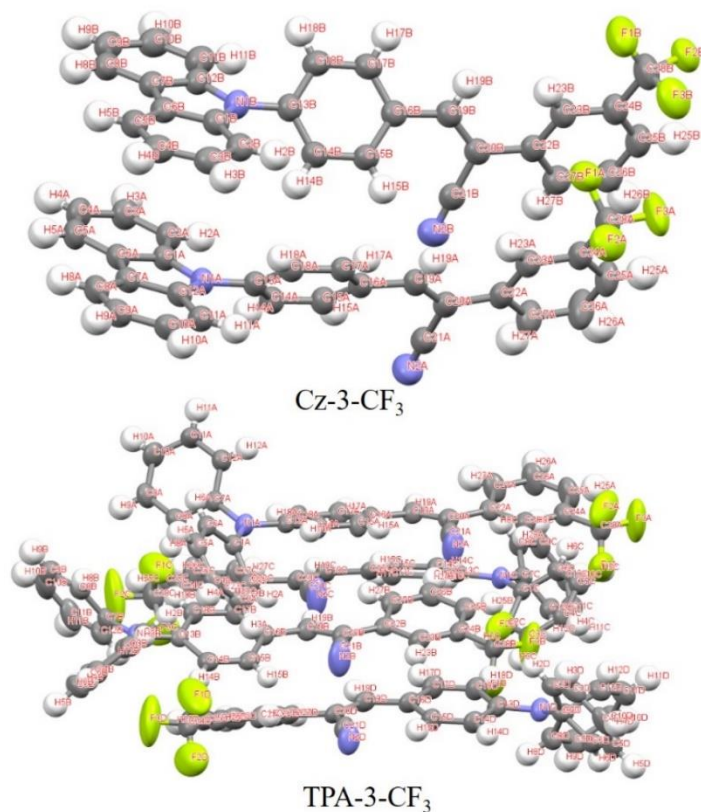

Fig. S14. Thermal ellipsoids of Cz-3-CF<sub>3</sub> and TPA-3-CF<sub>3</sub>.

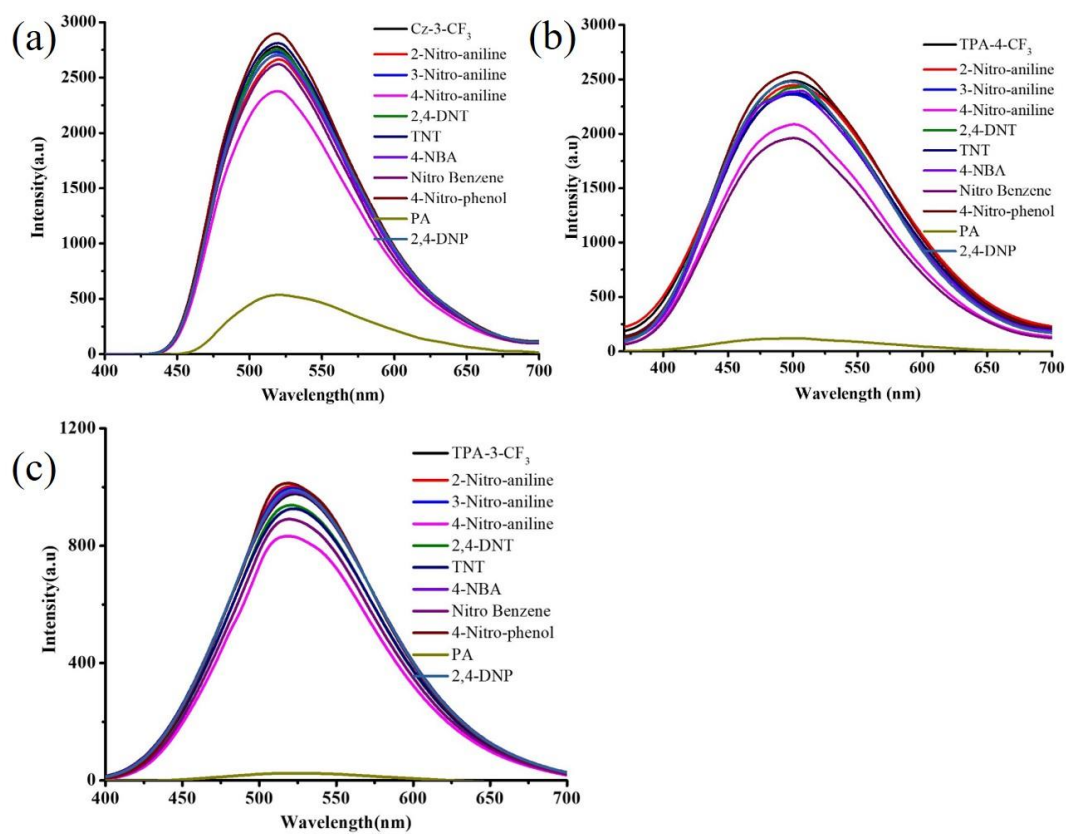

Fig. S15. Fluorescence sensing of (a) Cz-3-CF<sub>3</sub>, (b) TPA-4-CF<sub>3</sub> and (c) TPA-3-CF<sub>3</sub> towards PA (10<sup>-4</sup> M).

Table S3. Comparative study with various types of PA probes reported recently.

| Chemosensors                                                  | Other NACs interferences       | LOD                                              | Mode of detection                          | Reusability                                                  | Reference    |
|---------------------------------------------------------------|--------------------------------|--------------------------------------------------|--------------------------------------------|--------------------------------------------------------------|--------------|
| Cz-4CF <sub>3</sub>                                           | Nil                            | 51.4nm                                           | Solution, Solid and polymer film           | Reusable in filter paper, thin film by washing with water    | Present work |
| Organogelator                                                 | 4-NP, 2,4-DNP                  | 700ppt                                           | Gel/solution state                         | -----                                                        | [1]          |
| Conjugated polymer nanoparticles                              | Nil                            | Not reported                                     | Solution, solid and vapor phase            | -----                                                        | [2]          |
| Curcumin-BF <sub>2</sub> complexes                            | Nil                            | 4.21nM<br>11.61 nM                               | Test Strips, solution                      | -----                                                        | [3]          |
| Conjugated polyelectrolyte (PMI)                              | 4-NP, 2,4-DNP                  | $56.11 \times 10^{-11}M$                         | Test Strips, solution                      | -----                                                        | [4]          |
| N,N,N-trimethyl-2-(pyren-1-yloxy)ethanaminium bromide (PyOEA) | Nil                            | 23.2 nM                                          | Test Strips, solution                      | -----                                                        | [5]          |
| Triphenylamine based fluorophore                              | DNP                            | ~5ppb                                            | Solid and solution state                   | -----                                                        | [6]          |
| Cyanostilbene derivatives                                     | Not reported                   | $2.85 \times 10^{-7}$<br>$1.96 \times 10^{-6} M$ | Solid and solution state                   | -----                                                        | [7]          |
| Trifluoromethyle decorated MOFs                               | DNP, ONP, PNP                  | $3 \times 10^{-5}M$<br>$9 \times 10^{-6}M$       | Solid and solution state                   | Reusable in solution by centrifuged and washed with methanol | [8]          |
| Conjugated polymer (PFAM)                                     | 2,4-DNP, 4-NP                  | 57.8nm                                           | Solid, strips, solution                    | Reusable in filter paper, by washing with water              | [9]          |
| Pyrene-derived pH-responsive polymeric probe                  | 4-NP, 2,4-DNP                  | 56 $\mu M$                                       | Solution and polymer film                  | Reusable in film, by washing with water                      | [10]         |
| 1,8-naphthalimide-conjugated sulfonamide probe                | 2,4-DNP<br>4-NP (at high conc) | 25.6 $\mu M$                                     | Strips and solution state                  | -----                                                        | [11]         |
| Naphthalene based Schiff base                                 | DNP, NP, DNT, DNBA, DNB        | 0.11 $\mu M$                                     | Strips and solution state                  | -----                                                        | [12]         |
| Ln(III) based probes                                          | Nil                            | 0.5 $\mu M$                                      | Strips, sol-gel and solution state         | -----                                                        | [13]         |
| $\pi$ -Conjugated polymers                                    | DNT, DNP, NB, NT               | $47.39 \times 10^{-8} M$                         | Filter paper, solution                     | Reusable in filter paper by washing with water               | [14]         |
| Arylene-vinylene Terpyridine Conjugates                       | NB, NT, DNT, NBA, HNB, DNT     | $1.31-2.94 \times 10^{-7} M$                     | Test Strips, solution                      | Reusable in filter paper by washing with water               | [15]         |
| Dansyl tagged copolymer                                       | DNT, TNT                       | 3.7 $\mu M$                                      | Solution state, thin film and filter paper | -----                                                        | [16]         |
| Quinoxaline-based luminogen                                   | DNB, TNT                       | 28.7nM                                           | Test Strips, solution                      | -----                                                        | [17]         |
| Pyrene appended imidazolium probe                             | 4-NP, 2,4-DNP                  | 10nM                                             | solution                                   | -----                                                        | [18]         |
| Quinoline-benzimidazole conjugate                             | 2,4-DNP, NA                    | 4.86ppb                                          | Test Strips, solution                      | -----                                                        | [19]         |
| Fluorene based chemosensor                                    | 2,4-DNP                        | 22ppt,<br>0.23ppt                                | Solution                                   | -----                                                        | [20]         |
| Cyanine based chemosensor                                     | Nil                            | 8.24nm,<br>8.44nm <sub>21</sub>                  | Test Strips, solution                      | -----                                                        | [21]         |

- [1] S. Nath, S. K. Pathak, B. Pradhan, R. K. Gupta, K. A. Reddy, G. Krishnamoorthy and A. S. Achalkumar, *New J. Chem.* 2018, **42**, 5382–5394.
- [2] A. H. Malik, S. Hussain, A. Kalita and P. K. Iyer, *ACS Appl. Mater. Interfaces.* 2015, **7**, 26968–26976.
- [3] K. Ponnuvel, G. Banupriya and V. Padmini, *Sensors Actuators B Chem.* 2016, **234**, 34–45.
- [4] S. Hussain, A. H. Malik, M. A. Afroz and P. K. Iyer, *Chem. Commun.* 2015, **51**, 7207–7210.
- [5] H. Liang, Z. Yao, W. Ge, Y. Qiao, L. Zhang, Z. Cao and H. C. Wu, *RSC Adv.* 2016, **6**, 38328–38331.
- [6] A. Chowdhury and P. S. Mukherjee, *J. Org. Chem.* 2015, **80**, 4064–4075.
- [7] A. Ding, L. Yang, Y. Zhang, G. Zhang, L. Kong, X. Zhang, Y. Tian, X. Tao and J. Yang, *Chem. - A Eur. J.* 2014, **20**, 12215–12222.
- [8] M. L. Hu, M. Joharian, S. A. A. Razavi, A. Morsali, D. Z. Wu, A. Azhdari Tehrani, J. Wang, P. C. Junk and Z. F. Guo, *J. Hazard. Mater.* 2021, **406**, 124501.
- [9] A. S. Tanwar, S. Hussain, A. H. Malik, M. A. Afroz and P. K. Iyer, *ACS Sensors.* 2016, **1**, 1070–1077.
- [10] M. Gupta and H. Lee, *ACS Appl. Mater. Interfaces.* 2018, **10**, 41717–41723.
- [11] A. Kumar and P. S. Chae, *Sensors Actuators B Chem.* 2017, **240**, 1–9.
- [12] S. Maity, M. Shyamal, D. Das, P. Mazumdar, G. P. Sahoo and A. Misra, *Sensors Actuators B Chem.* 2017, **248**, 223–233.
- [13] J. Sahoo, D. S. Lakshmi, E. Suresh and P. S. Subramanian, *Sensors Actuators B Chem.* 2017, **250**, 215–223.
- [14] D. Giri, S.N. Islam and S.K. Patra, *Polymer (Guildf).* 2018, **134**, 242–253.
- [15] A. Sil, D. Giri and S. K. Patra, *J. Mater. Chem. C.* 2017, **5**, 11100–11110.
- [16] V. Kumar, B. Maiti, M. K. Chini, P. De and S. Satapathi, *Sci. Rep.* 2019, **9**, 7269.
- [17] L. Wang, M. Cui, H. Tang and D. Cao, *Dye. Pigment.* 2018, **155**, 107–113.
- [18] K. Ashwani, P. Anup and H. S. Kim, *Sensors and Actuators B*, 2016, **231**, 293–301.
- [19] K. Jiang, S.H. Luo, C. M. Pang, B. W. Wang, H. Qi. Wu and Z. Y. Wang, *Dyes and Pigments*, 2019, **162**, 367-376.
- [20] M. T. Waseem, H. M. Junaid, H. Gul, A. A. Khan, C. Yu and S. A. Shahzad, *J. Photochem. & Photobio. A: Chem.* 2022, **425**, 113660.
- [21] N. Nagamani, S. Lakshmanan, D. Govindaraj, C. Ramamoorthy, N. Ramalakshmi and S. A. Antony, *Spectrochimica Acta A: Mol. Biomol. Spectrosc.*, 2019, **207**, 321-327.
